# Supplementary material for: Refining the marine reptile turnover at the Early–Middle Jurassic transition
Source: PeerJ. 2021 Feb 22;9:e10647. doi: 10.7717/peerj.10647 (PMC7906043; doi:10.7717/peerj.10647)
Supplement: Supplemental Information 4 [file peerj-09-10647-s004.csv]

Specimen	Clade	Age	Axial_zone	Height	Length	Width
ULgPA35961	Ichthyosauria	Toarcian	dorsal	78	35	86
IRSNB_R_436	Ichthyosauria	Toarcian	caudal	118	48	118
IRSNB_R_437	Ichthyosauria	Toarcian	caudal	62	22	60
IRSNB_Vert-06462-0005	Ichthyosauria	Toarcian	cervical	63	24	64
IRSNB_Vert-11312-00007	Plesiosauria	Toarcian	dorsal	67	44	81
MNHNL_DOU378	Ichthyosauria	Toarcian	caudal	190	65	NA
MNHNL_DOU978	Plesiosauria	Toarcian	cervical	41	55	53
MNHNL_DOU944	Ichthyosauria	Toarcian	dorsal	82	36	NA
MNHNL_DOU998	Ichthyosauria	Toarcian	sacral	90	31	NA
MNHNL_DOU722	Plesiosauria	Toarcian	dorsal	50	37	60
MNHNL_DOU723	Plesiosauria	Toarcian	dorsal	55	30	63
MNHNL_DOU954	Plesiosauria	Toarcian	pectoral	63	42	73
MNHNL_DOU724	Plesiosauria	Toarcian	sacral	39	40	57
MNHNL_DOU369a	Ichthyosauria	Toarcian	dorsal	68	32	NA
MNHNL_DOU369b	Ichthyosauria	Toarcian	caudal	61	35	NA
MNHNL_DOU369c	Ichthyosauria	Toarcian	caudal	63	32	NA
MNHNL_HU384	Plesiosauria	Aalenian	caudal	32	NA	NA
MNHNL_BU157	Plesiosauria	Aalenian	cervical	67	62	71
TMNHNL_MP212	Ichthyosauria	Toarcian	cervical	62	32	56
MNHNL_BM779	Ichthyosauria	Bajocian	caudal	91	39	NA
MNHNL_BM758	Ichthyosauria	Bajocian	caudal	100	39	NA
MNHNL_BM725a	Ichthyosauria	Bajocian	cervical	83	38	NA
MNHNL_BM725b	Ichthyosauria	Bajocian	caudal	56	26	NA
MNHNL_BM461	Ichthyosauria	Bajocian	cervical	72	30	NA
MNHNL_BM392a	Ichthyosauria	Bajocian	caudal	72	30	NA
MNHNL_BM392b	Ichthyosauria	Bajocian	caudal	77	31	NA
MNHNL_BM392c	Ichthyosauria	Bajocian	caudal	72	29	NA
MNHNL_BM392d	Ichthyosauria	Bajocian	caudal	75	32	NA
MNHNL_BM779	Ichthyosauria	Bajocian	cervical	87	35	90
